# Supplementary material
Source: publisher figshare collection journal article supplement (https://acs.figshare.com/ndownloader/files/3702547)
Supplement: Supplementary file 1 [file 3702547]

## **Supporting Information**

### **Low-cost Y-doped TiO<sub>2</sub> nanosheets film with highly reactive {001} facets from CRT waste and enhanced photocatalytic removal of Cr(VI) and methyl orange**

Qijun Zhang<sup>a,\*</sup>, Yu Fu<sup>a</sup>, Yufeng Wu<sup>a,\*</sup>, Yinan Zhang<sup>b</sup> and Tieyong Zuo<sup>a</sup>

*a Institute of Circular Economy, Beijing University of Technology, Beijing, 100124, P. R. China.*

*b Institute of Biomaterials and Biomedical Engineering, University of Toronto, Toronto, ON, M5S 3G9, Canada.*

*\*Corresponding Author: Fax: +86-10-67396234; Tel: +86-10-67396234; E-mail: zhangqijun@bjut.edu.cn and wuyufeng@bjut.edu.cn.*

Number of pages: 10

Number of figures: 8

Number of tables: 1

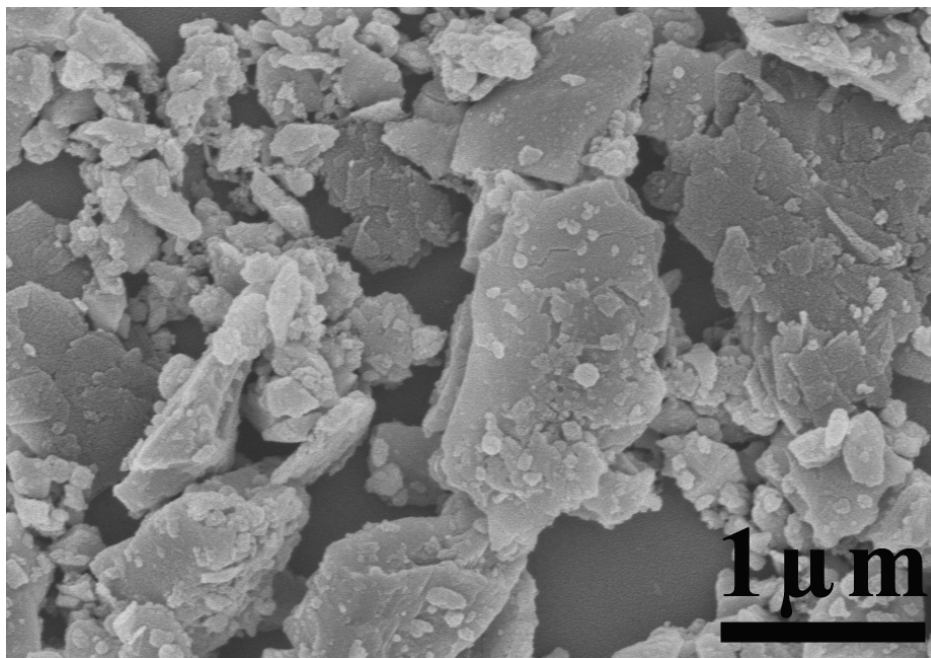

**Figure S1. SEM image of CRT phosphors waste.**

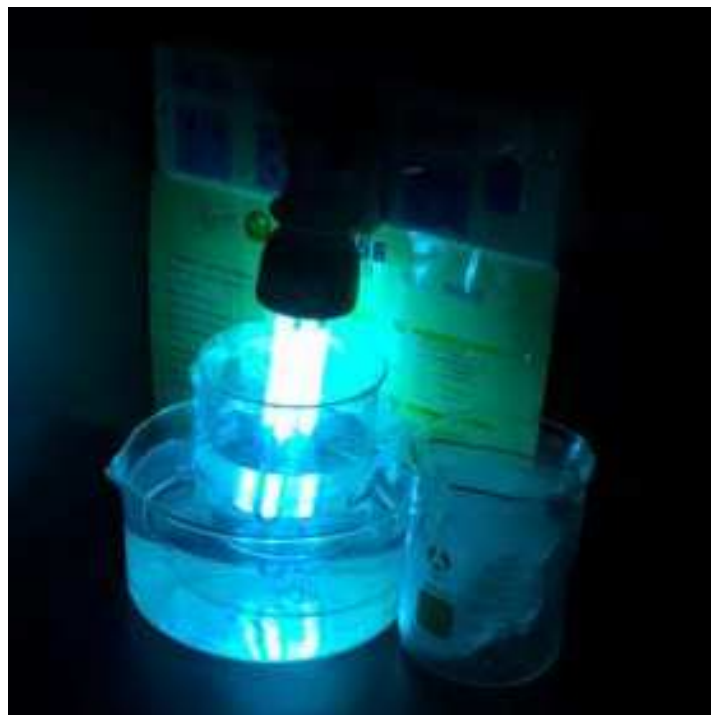

**Figure S2. The separation of Y and Eu from the as-obtained rare earth mixtures using photochemical reduction method.**

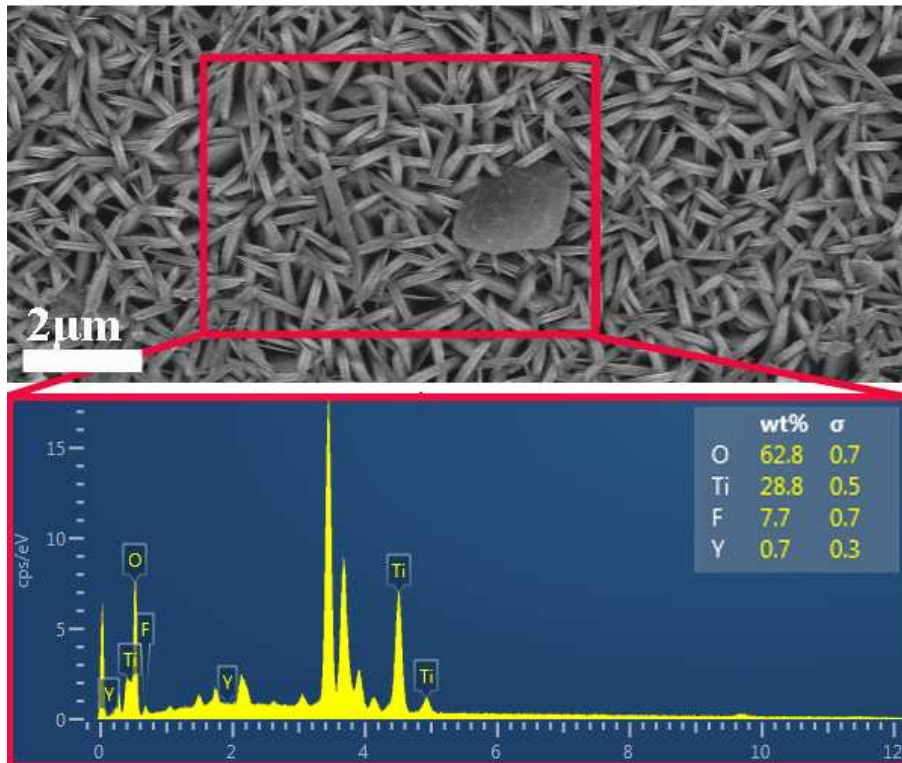

**Figure S3.** Upper row is SEM image of anatase  $\text{Y}^{3+}/\text{TiO}_2$  nanosheets film of synthesized by solvothermal approach at 200 °C for 12 h, and lower row is EDAX image obtained from the region enclosed by the red box in SEM image.

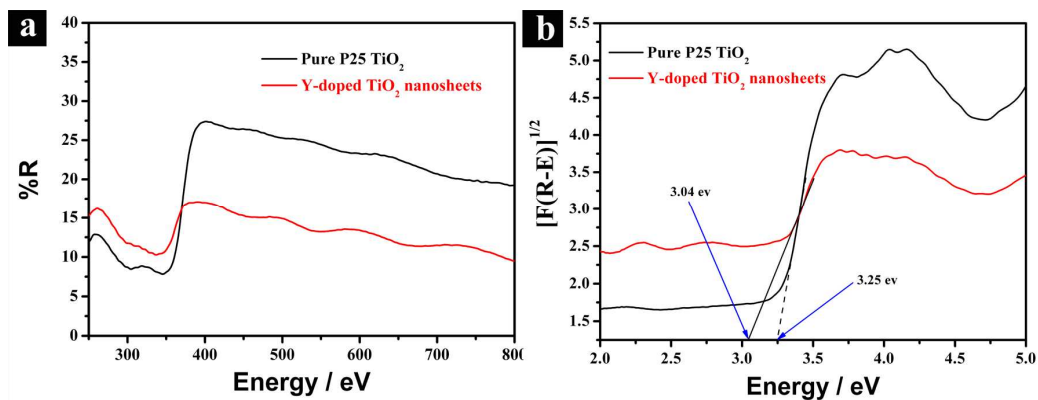

**Figure S4. (a) UV-vis diffuse reflectance (DRS) spectra and (b) the plots of  $[F(R-E)]^{1/2}$  vs. photon energy of samples  $Y^{3+}/TiO_2$  and pure P25 TiO<sub>2</sub>.**

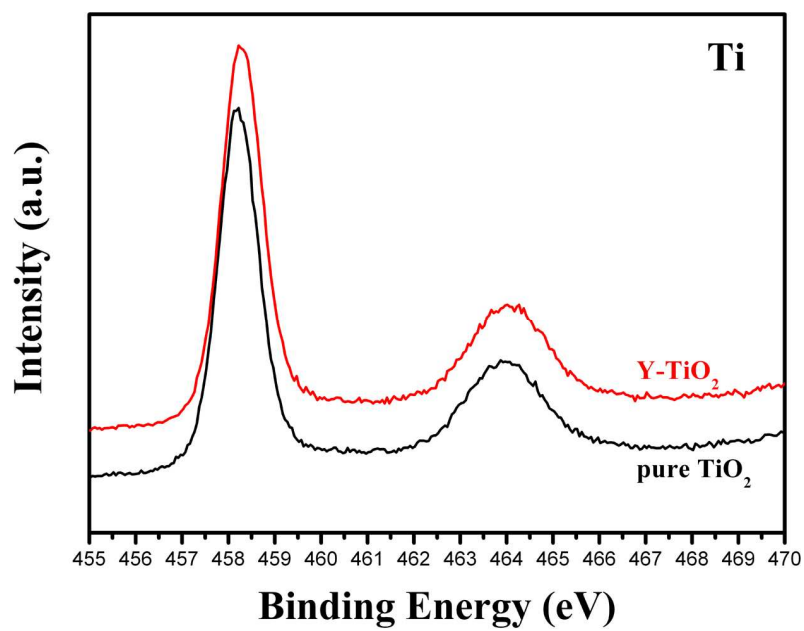

**Figure S5. High-resolution XPS spectrum of Ti 2p on the surface of Y<sup>3+</sup>/TiO<sub>2</sub> and pure P25 TiO<sub>2</sub>.**

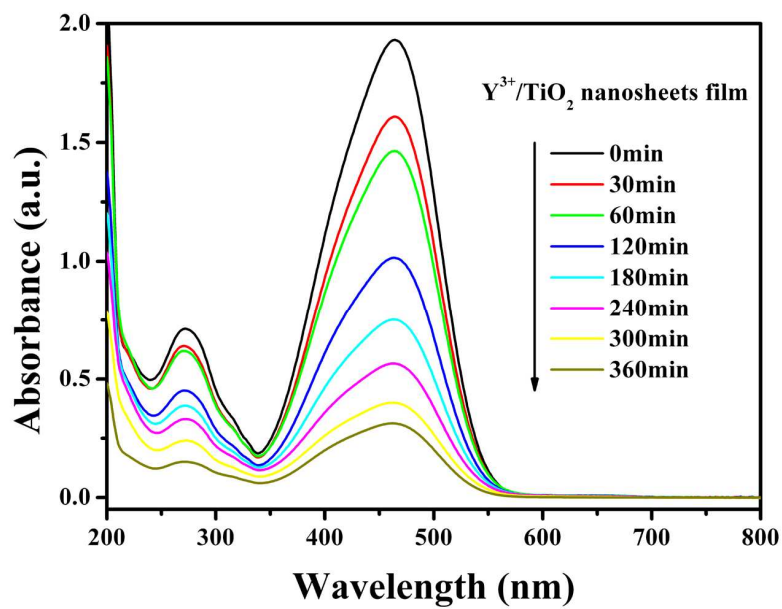

Figure S6. UV-vis spectral changes of MO in the presence the  $Y^{3+}/TiO_2$  nanosheets films as a function of UV light illumination time.

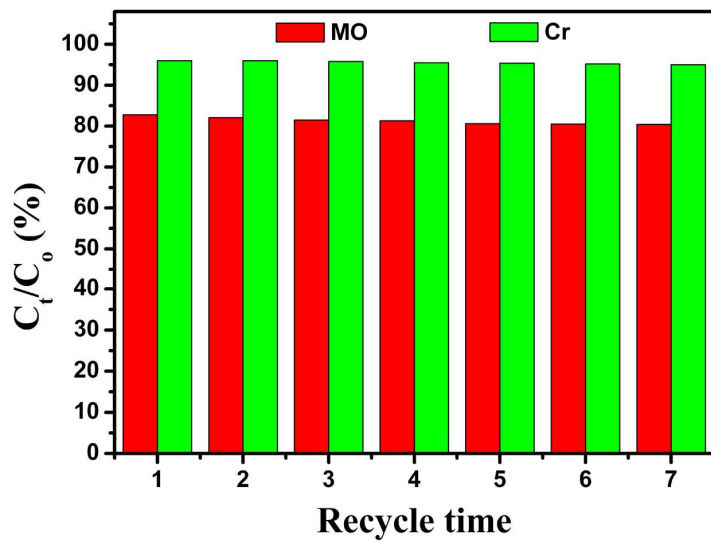

Figure S7. Results of recycling studies. Conditions:  $[MO]_0 = 10$  mg/L;  $V_{MO} = 20$  mL;  $[Cr(VI)]_0 = 10$  mg/L;  $V_{Cr(VI)} = 20$  mL;  $S_{catalyst} = 2\text{ cm} \times 4\text{ cm}$ ; 30 W UV light irradiation; irradiation time for MO and Cr(VI) is 360 min and 300 min, respectively.

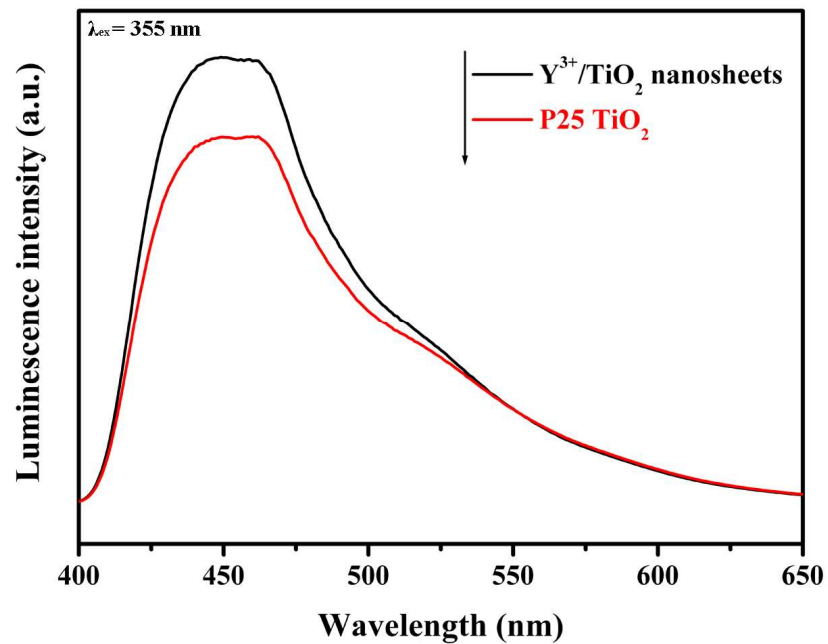

**Figure S8.** PL spectra of the as-prepared  $\text{Y}^{3+}/\text{TiO}_2$  and pure P25  $\text{TiO}_2$ , which clearly indicates that a more efficient transfer and separation of photogenerated electrons and holes caused by doped  $\text{Y}^{3+}$  ions.

**Table S1. Chemical compositions (wt %) of recycled  $\text{Y}_2\text{O}_3/\text{Eu}_2\text{O}_3$ ,  $\text{EuSO}_4$  and the as-obtained yttrium sulfate. (XRF analysis).**

|                                                       | $\text{Y}_2\text{O}_3$ | $\text{Eu}_2\text{O}_3$ | $\text{SO}_3$ | $\text{ZnO}$ | $\text{Al}_2\text{O}_3$ | $\text{SiO}_2$ | $\text{Fe}_2\text{O}_3$ | $\text{PbO}$ | $\text{BaO}$ | $\text{K}_2\text{O}$ |
|-------------------------------------------------------|------------------------|-------------------------|---------------|--------------|-------------------------|----------------|-------------------------|--------------|--------------|----------------------|
| Recycled $\text{Y}_2\text{O}_3/\text{Eu}_2\text{O}_3$ | 94.46                  | 5.28                    | N.D.          | 0.02         | 0.06                    | 0.06           | 0.07                    | 0.05         | N.D.         | N.D.                 |
| $\text{EuSO}_4$                                       | 1.44                   | 59.45                   | 39.08         | N.D.         | N.D.                    | N.D.           | N.D.                    | 0.03         | N.D.         | N.D.                 |
| Yttrium sulfate                                       | 48.5                   | 0.03                    | 51.35         | 0.01         | 0.03                    | 0.03           | 0.04                    | 0.01         | N.D.         | N.D.                 |

N.D.: not detectable.
